# Supplementary material for: RelB acts as a molecular switch driving chronic inflammation in glioblastoma multiforme
Source: PubMed Central journal article supplement (PMC6541631; doi:10.1038/s41389-019-0146-y), 2019-05-29
Supplement: 41389_2019_146_MOESM1_ESM.pdf [file 41389_2019_146_MOESM1_ESM.pdf]

## Supplementary table I

| Cytokine | Receptor Gene | Cytokines | Receptors | Combined | Enrichment Score |
|----------|---------------|-----------|-----------|----------|------------------|
| IL1B     | IL1R1         | 0.002     | 0.007     | 0.000    | <b>3.775</b>     |
| OSM      | OSMR          | 0.001     | 0.012     | 0.000    | <b>3.751</b>     |
| TNFSF11  | TNFRSF11A     | 0.051     | 0.002     | 0.001    | <b>3.052</b>     |
| IL6      | IL6R          | 0.013     | 0.006     | 0.001    | <b>3.169</b>     |
| TNF      | TNFRSF1A      | 0.086     | 0.001     | 0.001    | <b>2.965</b>     |
| IL4      | IL4R          | 0.062     | 0.005     | 0.002    | <b>2.618</b>     |
| IL1A     | IL1R1         | 0.047     | 0.007     | 0.002    | <b>2.646</b>     |
| IL18     | IL18R1        | 0.099     | 0.004     | 0.003    | <b>2.539</b>     |
| TNFSF13B | TNFRSF17      | 0.000     | 0.093     | 0.000    | <b>3.736</b>     |
| TNFSF13  | TNFRSF17      | 0.001     | 0.093     | 0.001    | <b>3.292</b>     |
| IL10     | IL10RA        | 0.034     | 0.029     | 0.006    | <b>2.215</b>     |
| CSF1     | CSF1R         | 0.207     | 0.002     | 0.004    | <b>2.454</b>     |
| IL15     | IL15RA        | 0.166     | 0.004     | 0.005    | <b>2.310</b>     |
| CSF3     | CSF3R         | 0.085     | 0.017     | 0.008    | <b>2.076</b>     |
| IL7      | IL7R          | 0.062     | 0.036     | 0.012    | <b>1.921</b>     |
| TNFSF12  | TNFRSF12A     | 0.108     | 0.013     | 0.009    | <b>2.065</b>     |
| CD70     | CD27          | 0.067     | 0.047     | 0.016    | <b>1.794</b>     |
| IL20     | IL20RA        | 0.115     | 0.017     | 0.011    | <b>1.954</b>     |
| TNFSF14  | LTBR          | 0.007     | 0.311     | 0.014    | <b>1.846</b>     |
| TGFB2    | TGFBR2        | 0.515     | 0.003     | 0.013    | <b>1.880</b>     |
| KITLG    | KIT           | 0.033     | 0.300     | 0.049    | <b>1.313</b>     |
| LTA      | TNFRSF1A      | 0.948     | 0.001     | 0.074    | <b>1.132</b>     |
| TNFSF10  | TNFRSF10A     | 0.025     | 0.330     | 0.043    | <b>1.363</b>     |
| FASLG    | FAS           | 0.265     | 0.022     | 0.031    | <b>1.513</b>     |
| LIF      | LIFR          | 0.011     | 0.482     | 0.038    | <b>1.423</b>     |
| TGFB3    | TGFBR3        | 0.013     | 0.788     | 0.113    | <b>0.946</b>     |
| IL2      | ISG20         | 0.465     | 0.033     | 0.080    | <b>1.095</b>     |
| IL13     | IL13RA1       | 0.417     | 0.040     | 0.081    | <b>1.091</b>     |
| IL17A    | CDw217        | 0.173     | 0.107     | 0.071    | <b>1.147</b>     |
| TGFB1    | TGFBR1        | 0.309     | 0.076     | 0.093    | <b>1.032</b>     |
| MST1     | MST1R         | 0.110     | 0.311     | 0.122    | <b>0.913</b>     |
| IL11     | IL11RA        | 0.102     | 0.365     | 0.135    | <b>0.871</b>     |
| TNFSF8   | TNFRSF8       | 0.447     | 0.112     | 0.177    | <b>0.753</b>     |
| TNFSF18  | TNFRSF18      | 0.755     | 0.057     | 0.245    | <b>0.611</b>     |
| LTB      | LTBR          | 0.247     | 0.311     | 0.218    | <b>0.662</b>     |
| EPO      | EPOR          | 0.598     | 0.160     | 0.302    | <b>0.520</b>     |
| TPO      | MPL           | 0.586     | 0.218     | 0.350    | <b>0.455</b>     |
| IFNG     | IFNGR1        | 0.603     | 0.196     | 0.341    | <b>0.467</b>     |
| IFNA1    | CD118         | 0.207     | 0.482     | 0.280    | <b>0.553</b>     |
| IL5      | CDw125        | 0.706     | 0.360     | 0.550    | <b>0.260</b>     |
| CSF2     | IL5RA         | 0.808     | 0.360     | 0.639    | <b>0.195</b>     |
| IFNB1    | CD118         | 0.736     | 0.482     | 0.653    | <b>0.185</b>     |
| FLT3LG   | FLT3          | 0.955     | 0.426     | 0.867    | <b>0.062</b>     |
