# Supplementary material for: RelB acts as a molecular switch driving chronic inflammation in glioblastoma multiforme
Source: PubMed Central journal article supplement (PMC6541631; doi:10.1038/s41389-019-0146-y), 2019-05-29

Supplementary Fig. 2

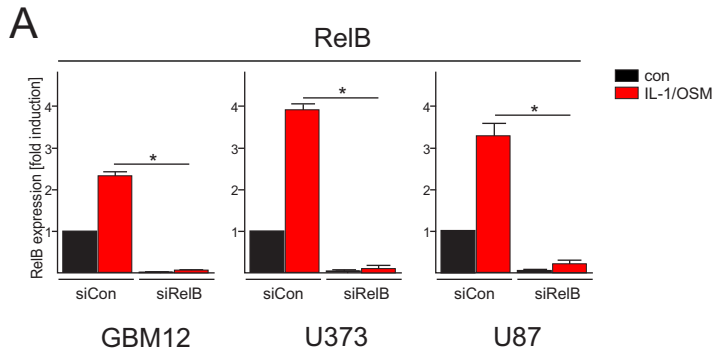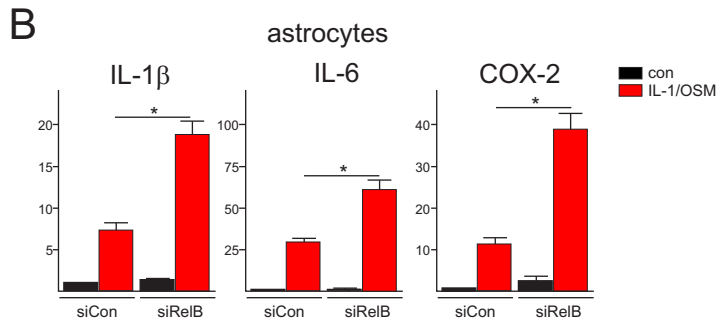

Supplement: 41389_2019_146_MOESM3_ESM.pdf [file 41389_2019_146_MOESM3_ESM.pdf]
